# Supplementary material for: Profiling of Oral Microbiota in Early Childhood Caries Using Single-Molecule Real-Time Sequencing
Source: PubMed Central journal article supplement (PMC5694851; doi:10.3389/fmicb.2017.02244), 2017-11-15

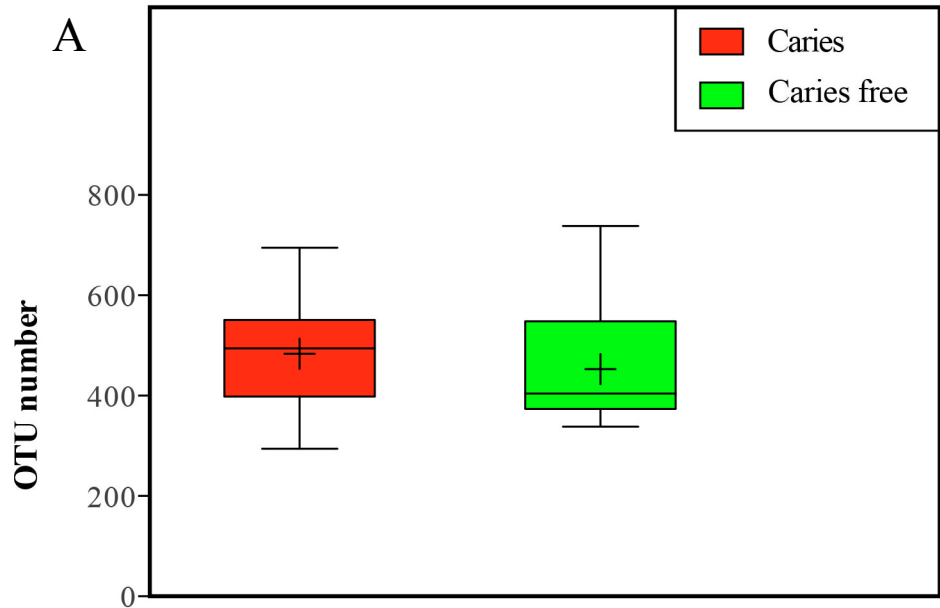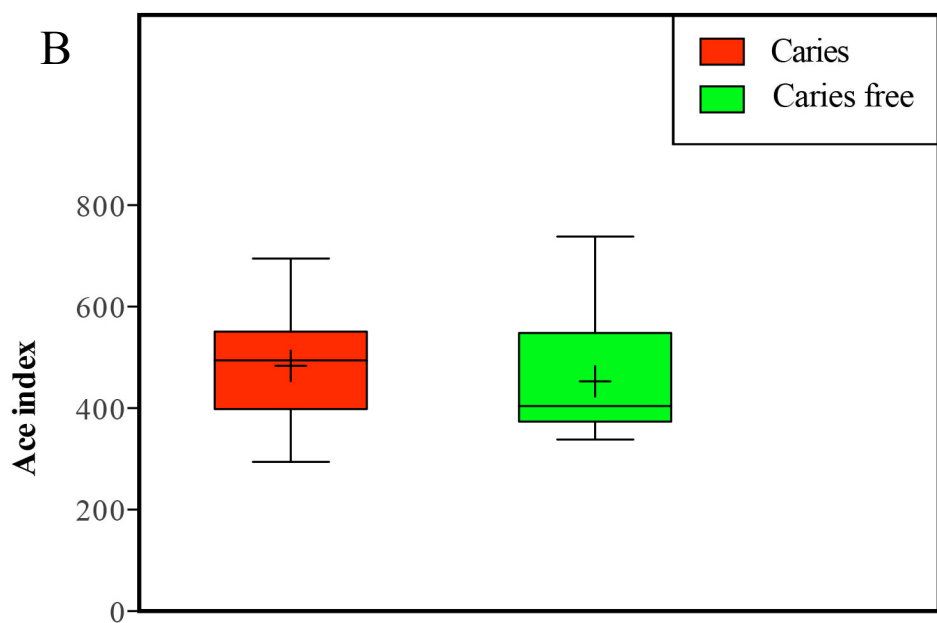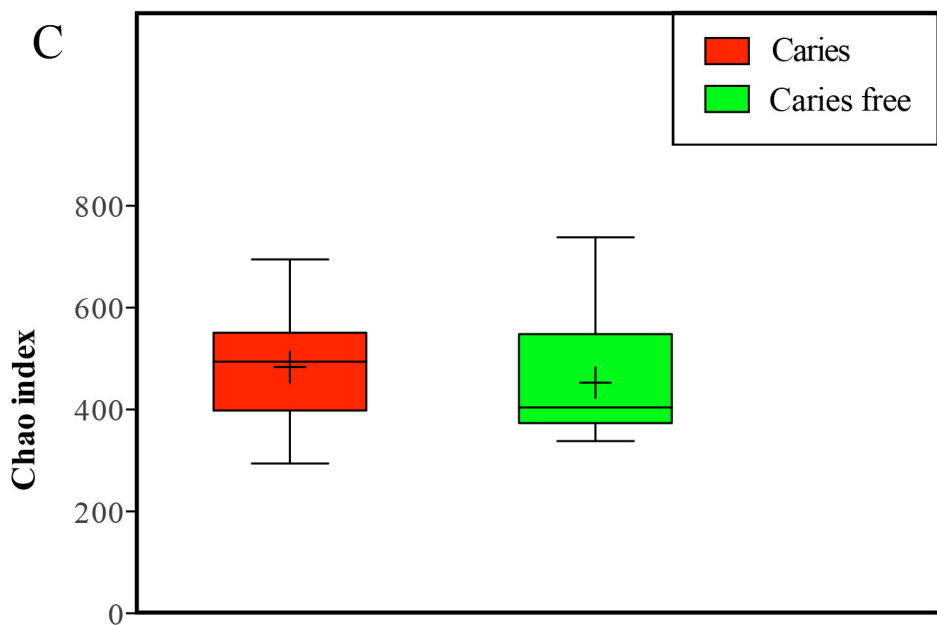

Supplement: Image3.pdf [file Image3.pdf]
